# Supplementary material for: The Connection between Knowledge and the Nutritional Behaviour of Parents and the Occurrence of Overweight and Obesity among Preschool Children—A Pilot Study
Source: MDPI journal article supplement (doi:10.3390/nu16010174), 2024-01-04
Supplement: s1 [file s1]

S1.

CODE:

## Questionnaire to investigate the knowledge and eating behaviour of preschool aged children's parents

### I. Eating behaviour

1. How do you assess your diet?

Please indicate **one** answer.

- ☐ Very bad  
☐ Bad  
☐ Good  
☐ Very good

2. Do you follow any diet?

Please indicate **one** answer.

- ☐ Yes\*  
☐ No

\*If so, what kind of diet?: .....

3. How often do you eat in each place?

**One** answer per line should be given.

|                      | every day | several times per week | once per week | several times per month | once per month | several times per year | once per year | never |
|----------------------|-----------|------------------------|---------------|-------------------------|----------------|------------------------|---------------|-------|
| dairy bar            |           |                        |               |                         |                |                        |               |       |
| canteen              |           |                        |               |                         |                |                        |               |       |
| fast food restaurant |           |                        |               |                         |                |                        |               |       |
| restaurant           |           |                        |               |                         |                |                        |               |       |
| home                 |           |                        |               |                         |                |                        |               |       |

4. How often do you consume the following products?

**One** answer per line should be given.

|                                                  | several times per day | once per day | several times per week | once per week | 1-3 times per month | never |
|--------------------------------------------------|-----------------------|--------------|------------------------|---------------|---------------------|-------|
| vegetables (not applicable to potatoes, pulses)  |                       |              |                        |               |                     |       |
| potatoes (not including fries or crisps)         |                       |              |                        |               |                     |       |
| pulses (e.g. beans, soya, peas, chickpeas, etc.) |                       |              |                        |               |                     |       |
| fruits                                           |                       |              |                        |               |                     |       |

|                                                                                                 | several times<br>per day | once<br>per day | several times<br>per week | once<br>per week | 1-3 times<br>per month | never |
|-------------------------------------------------------------------------------------------------|--------------------------|-----------------|---------------------------|------------------|------------------------|-------|
| whole-grain bread                                                                               |                          |                 |                           |                  |                        |       |
| light bread<br>(e.g. toast, rolls, croissants,<br>etc.)                                         |                          |                 |                           |                  |                        |       |
| white rice, light pasta, small<br>groats<br>(e.g. semolina, couscous, etc.)                     |                          |                 |                           |                  |                        |       |
| brown rice, coarse groats<br>(e.g. buckwheat, barley, etc.),<br>whole-grain pasta, oatmeal      |                          |                 |                           |                  |                        |       |
| farinaceous products<br>(e.g. dumplings, croissants,<br>potato dumplings, pancakes,<br>etc.).   |                          |                 |                           |                  |                        |       |
| milk                                                                                            |                          |                 |                           |                  |                        |       |
| dairy products<br>(e.g. yoghurt, kefir,<br>buttermilk, etc.).                                   |                          |                 |                           |                  |                        |       |
| yellow cheeses (including<br>processed cheeses, moulded<br>cheeses)                             |                          |                 |                           |                  |                        |       |
| curd cheeses (including<br>homogenised cheeses, curd<br>desserts), cottage cheeses              |                          |                 |                           |                  |                        |       |
| cold cuts, sausages, wieners                                                                    |                          |                 |                           |                  |                        |       |
| fish                                                                                            |                          |                 |                           |                  |                        |       |
| red meat<br>(e.g. pork, beef, veal, etc.)                                                       |                          |                 |                           |                  |                        |       |
| white meat<br>(e.g. chicken, turkey, etc.)                                                      |                          |                 |                           |                  |                        |       |
| butter                                                                                          |                          |                 |                           |                  |                        |       |
| margarine or mixes of butter<br>with margarine                                                  |                          |                 |                           |                  |                        |       |
| lard                                                                                            |                          |                 |                           |                  |                        |       |
| instant products<br>(e.g. powdered soups, ready-<br>to-pour dishes, etc.)                       |                          |                 |                           |                  |                        |       |
| confectionery<br>(e.g. sweets, biscuits, chocolate<br>bars and other confectionery<br>products) |                          |                 |                           |                  |                        |       |
| fast-food products<br>(e.g. hamburgers, pizza,<br>casseroles, etc.)                             |                          |                 |                           |                  |                        |       |
| salty snacks<br>(e.g. sticks, crisps, etc.)                                                     |                          |                 |                           |                  |                        |       |

5. How much water (e.g. mineral, table water) do you usually drink during the day?

Please indicate **one** answer.

- ☐ I don't drink water
- ☐ Up to 0.5 litres
- ☐ Approximately 1 litre
- ☐ From 1,5 to 2 litres
- ☐ Above 2 litres

6. How many meals do you usually eat during the day?

Please indicate **one** answer.

**Meal** – foods or combinations of foods customarily consumed at certain times of the day, e.g. morning, noon, evening.

- ☐ 1 meal
- ☐ 2 meals
- ☐ 3 meals
- ☐ 4 meals
- ☐ 5 meals
- ☐ Above 5 meals

7. Do you eat meals at regular times during the day?

Please indicate **one** answer.

- ☐ No
- ☐ Yes, but only certain
- ☐ Yes, all of them

8. How often do you eat between meals (snack)?

Please indicate **one** answer.

**Snacking** – occasional consumption of products or sets of products between meals, mostly in small quantities.

- ☐ Several times per day
- ☐ Once per day
- ☐ Several times per week
- ☐ Once per week
- ☐ 1-3 times per month
- ☐ Never

## II. Non-food behaviour/physical activity

1. Does your child regularly attend organised physical activities (e.g. swimming, football training, dance, karate etc.) outside kindergarten?

Please indicate **one** answer.

- ☐ Yes\*
- ☐ No

\*If so, how many times per week?:.....

2. Does your child regularly do gymnastics at home?

Please indicate **one** answer.

- ☐ Yes, every day
- ☐ Yes, 5-6 times per week
- ☐ Yes, 3-4 times per week
- ☐ Yes, 1-2 times per week

☐ No

3. Does your child regularly spend at least one hour actively outdoors (e.g. cycling, playing in the playground, going for long walks)?

*Please indicate **one** answer.*

- ☐ Yes, every day  
☐ Yes, 5-6 times per week  
☐ Yes, 3-4 times per week  
☐ Yes, 1-2 times per week  
☐ No

### III. Nutritional knowledge

1. How would you rate your nutritional knowledge?

*Please indicate **one** answer.*

- ☐ Insufficient  
☐ Sufficient  
☐ Good  
☐ Very good  
☐ I don't know

2. In your opinion, is proper nutrition of preschool children a prerequisite for their optimal physical, mental and social development?

*Please indicate **one** answer.*

- ☐ Yes  
☐ No  
☐ I don't know

3. In your opinion, how many meals during a day should a child eat?

*Please indicate **one** answer.*

- ☐ 2 meals  
☐ 3 meals  
☐ 4 meals  
☐ 5 meals  
☐ I don't know

4. What proportion of the daily energy needs should be covered by meals consumed in a kindergarten?

*Please indicate **one** answer.*

- ☐ 30%  
☐ 50%  
☐ 75%  
☐ 90%  
☐ I don't know

5. From which source do you think the largest percentage of energy should come in a child's diet?

*Please indicate **one** answer.*

- ☐ Simple carbohydrates (e.g. confectionery, fruit)  
☐ Complex carbohydrates (e.g. vegetables, whole grains)  
☐ Animal fats (e.g. butter, lard)

- ☐ Plant-based oils (e.g. avocados, nuts and seeds, plant oils)
- ☐ Animal protein (e.g. meat, fish, milk, yoghurt)
- ☐ Plant protein (e.g. pulses, plant-based drinks/yoghurts - soya, coconut, oat, etc.)
- ☐ I don't know

**6. In your opinion, what is a universal drink with which children should quench their thirst?**

*Please indicate **one** answer.*

- ☐ Juice
- ☐ Sweetened beverage of the "cola" type
- ☐ Water
- ☐ Tea
- ☐ Coffee
- ☐ Milk
- ☐ Flavoured water
- ☐ I don't know
- ☐ Other (what kind of?):.....

**7. How many portions of milk and/or dairy products do you think a child should consume during a day?**

*Please indicate **one** answer.*

**1 portion of milk, dairy products** – 1 glass of milk, yoghurt, kefir or buttermilk, 100 grams of cottage cheese, 2 slices of yellow cheese, packet of homogenised cottage cheese, granulated cottage cheese.

- ☐ 1-2 portions
- ☐ 3-4 portions
- ☐ 5-6 portions
- ☐ Above 6 portions
- ☐ I don't know

**8. In your opinion, should a preschool child eat pulses (e.g. beans, broad beans, chickpeas, lentils, etc.)?**

*Please indicate **one** answer.*

- ☐ Yes
- ☐ No
- ☐ I don't know

**9. In how many meals per day do you think fruits and vegetables should be included in your child's diet?**

*Please indicate **one** answer.*

- ☐ In one meal
- ☐ In two meals
- ☐ In three meals
- ☐ In all meals
- ☐ I don't know

**10. Which articles should predominate in a child's diet - vegetables or fruits?**

*Please indicate **one** answer.*

- ☐ Vegetables
- ☐ Fruits
- ☐ I don't know

11. In your opinion, what meat should be in children's diets most often?

Please indicate **one** answer.

- ☐ Poultry
- ☐ Veal
- ☐ Beef
- ☐ Pork
- ☐ I don't know

12. What is the maximum amount of salt that can be in a child's diet per day?

Please indicate **one** answer.

- ☐ 1 teaspoon
- ☐ 2 teaspoons
- ☐ 3 teaspoons
- ☐ There is no correct answer
- ☐ I don't know

13. Would you like the idea of the organisation, by the kindergarten your child attends, classes connected with proper child's nutrition?

Please indicate **one** answer.

- ☐ Yes
- ☐ No

#### IV. Metric

Please complete your details (only questions 1st and 2nd respectively relate to your child's age and gender).

1. Child's age (in years): .....

2. Child's gender:

- ☐ Girl
- ☐ Boy

3. Parent's/ legal guardian's age (in years): .....

4. Parent's/ legal guardian's gender:

- ☐ Woman
- ☐ Man

5. Place of residence:

- ☐ Village
- ☐ City of up to 100 000 inhabitants
- ☐ City with more than 100 000 inhabitants

6. Education:

- ☐ Primary
- ☐ Secondary
- ☐ Professional
- ☐ Higher

7. Professional status:

- ☐ Student
- ☐ Working
- ☐ Unemployed
- ☐ On a pension
- ☐ Other: .....

8. Parent's/legal guardian's body weight (in kilograms): .....

9. Parent's/legal guardian's body height (in centimetres): .....
